# Supplementary material for: Pharmacology Mechanism of Polygonum Bistorta in Treating Ulcerative Colitis Based on Network Pharmacology
Source: Hindawi journal article supplement (doi:10.1155/2022/6461560), 2022-12-28
Supplement: f1 [file 6461560.f1.docx]

TABLE S1: The potential targets of PB.

| Geen name | Protein name | Uniprot ID | Compositions of PB |
| --- | --- | --- | --- |
| ESR1 | Estrogen receptor | [P03372](https://www.uniprot.org/uniprot/P03372) | (+)-catechin, ellagic acid, poriferast-5-en-3beta-ol, beta-sitosterol |
| AR | Androgen receptor | [P10275](https://www.uniprot.org/uniprot/P10275) | quercetin, ellagic acid, poriferast-5-en-3beta-ol, beta-sitosterol |
| HSP90AA1 | Heat shock protein HSP 90-alpha | [P07900](https://www.uniprot.org/uniprot/P07900) | (+)-catechin, quercetin, ellagic acid, beta-sitosterol |
| RELA | Transcription factor p65 | [Q04206](https://www.uniprot.org/uniprot/Q04206) | quercetin, ellagic acid |
| CDKN1A | Cyclin-dependent kinase inhibitor 1 | [P38936](https://www.uniprot.org/uniprot/P38936) | quercetin, ellagic acid |
| MMP2 | 72 kDa type IV collagenase | [P08253](https://www.uniprot.org/uniprot/P08253) | quercetin, ellagic acid |
| MMP9 | Matrix metalloproteinase-9 | [P14780](https://www.uniprot.org/uniprot/P14780) | quercetin, ellagic acid |
| NFKBIA | NF-kappa-B inhibitor alpha | [P25963](https://www.uniprot.org/uniprot/P25963) | quercetin, ellagic acid |
| CXCL8 | Ubiquitin carboxyl-terminal hydrolase 17 | [Q6R6M4](https://www.uniprot.org/uniprot/Q6R6M4) | quercetin, ellagic acid |
| IGF2 | Insulin-like growth factor 1 receptor | [P08069](https://www.uniprot.org/uniprot/P08069) | quercetin, ellagic acid |
| GSTM1 | Putative endogenous retrovirus group K member 11-1 Env polyprotein | [P61568](https://www.uniprot.org/uniprot/P61568) | quercetin, ellagic acid |
| PTGS2 | Prostaglandin G/H synthase 2 | [P35354](https://www.uniprot.org/uniprot/P35354) | (+)-catechin, quercetin, ellagic acid, ZINC04073977, beta-sitosterol |
| PTGS1 | Prostaglandin G/H synthase 1 | [P23219](https://www.uniprot.org/uniprot/P23219) | (+)-catechin, quercetin, beta-sitosterol |
| SLC6A4 | Sodium-dependent serotonin transporter | [P31645](https://www.uniprot.org/uniprot/P31645) | poriferast-5-en-3beta-ol,beta-sitosterol |
| OPRM1 | Mu-type opioid receptor | [P35372](https://www.uniprot.org/uniprot/P35372) | beta-sitosterol |
| BCL2 | Apoptosis regulator Bcl-2 | [P10415](https://www.uniprot.org/uniprot/P10415) | quercetin, beta-sitosterol |
| BAX | Apoptosis regulator BAX | [Q07812](https://www.uniprot.org/uniprot/Q07812) | quercetin, beta-sitosterol |
| CASP9 | Caspase-9 | [P55211](https://www.uniprot.org/uniprot/P55211) | quercetin, beta-sitosterol |
| JUN | Transcription factor AP-1 | [P05412](https://www.uniprot.org/uniprot/P05412) | quercetin, beta-sitosterol |
| CASP3 | Caspase-3 | [P42574](https://www.uniprot.org/uniprot/Q14790) | quercetin, beta-sitosterol |
| CASP8 | Caspase-8 | [Q14790](https://www.uniprot.org/uniprot/Q14790) | quercetin, beta-sitosterol |
| PON1 | Serum paraoxonase/arylesterase 1 | [P27169](https://www.uniprot.org/uniprot/P27169) | quercetin, beta-sitosterol |
| PPARG | Peroxisome proliferator-activated receptor gamma | [P37231](https://www.uniprot.org/uniprot/P37231) | quercetin, poriferast-5-en-3beta-o, beta-sitosterol |
| DPP4 | Dipeptidyl peptidase 4 | [P27487](https://www.uniprot.org/uniprot/P27487) | quercetin |
| PRSS1 | Trypsin-1 | [P07477](https://www.uniprot.org/uniprot/P07477) | quercetin |
| TOP2A | DNA topoisomerase 2-alpha | [P11388](https://www.uniprot.org/uniprot/P11388) | quercetin |
| F2 | Prothrombin | [P00734](https://www.uniprot.org/uniprot/P00734) | quercetin |
| MMP3 | Stromelysin-1 | [P08254](https://www.uniprot.org/uniprot/P08254) | quercetin |
| ACHE | Acetylcholinesterase | [P22303](https://www.uniprot.org/uniprot/P22303) | quercetin, poriferast-5-en-3beta-o, beta-sitosterol |
| EGFR | Epidermal growth factor receptor | [P00533](https://www.uniprot.org/uniprot/P00533) | quercetin, ellagic acid |
| AKT1 | RAC-alpha serine/threonine-protein kinase | [P31749](https://www.uniprot.org/uniprot/P31749) | quercetin, ellagic acid |
| CCND1 | G1/S-specific cyclin-D1 | [P24385](https://www.uniprot.org/uniprot/P24385) | quercetin |
| BCL2L1 | Bcl-2-like protein 1 | [Q07817](https://www.uniprot.org/uniprot/Q07817) | quercetin |
| FOS | Proto-oncogene c-Fos | [P01100](https://www.uniprot.org/uniprot/P01100) | quercetin |
| PLAU | Urokinase-type plasminogen activator | [P00749](https://www.uniprot.org/uniprot/P00749) | quercetin |
| MAPK1 | Mitogen-activated protein kinase 1 | [P28482](https://www.uniprot.org/uniprot/P28482) | quercetin |
| IL10RB | Interleukin-10 receptor subunit beta | [Q08334](https://www.uniprot.org/uniprot/Q08334) | quercetin |
| RB1 | Retinoblastoma-associated protein | [P06400](https://www.uniprot.org/uniprot/P06400) | quercetin |
| IL6ST | Interleukin-6 receptor subunit beta | [P40189](https://www.uniprot.org/uniprot/P40189) | quercetin |
| TP53 | Cellular tumor antigen p53 | [P04637](https://www.uniprot.org/uniprot/P04637) | quercetin |
| TOP1 | DNA topoisomerase 1 | [P11387](https://www.uniprot.org/uniprot/P11387) | quercetin |
| RAF1 | RAF proto-oncogene serine/threonine-protein kinase | [P04049](https://www.uniprot.org/uniprot/P04049) | quercetin |
| SOD1 | Superoxide dismutase [Cu-Zn] | [P00441](https://www.uniprot.org/uniprot/P00441) | quercetin |
| MMP1 | Interstitial collagenase | [P03956](https://www.uniprot.org/uniprot/P03956) | quercetin |
| HIF1A | Hypoxia-inducible factor 1-alpha | [Q16665](https://www.uniprot.org/uniprot/Q16665) | quercetin |
| STAT1 | Signal transducer and activator of transcription 1-alpha/beta | [P42224](https://www.uniprot.org/uniprot/P42224) | quercetin |
| RUNX1T1 | Protein CBFA2T1 | [Q06455](https://www.uniprot.org/uniprot/Q06455) | quercetin |
| CDK1 | Cyclin-dependent kinase 1 | [P06493](https://www.uniprot.org/uniprot/P06493) | quercetin |
| ERBB2 | Receptor tyrosine-protein kinase erbB-2 | [P04626](https://www.uniprot.org/uniprot/P04626) | quercetin, ellagic acid |
| HMOX1 | Heme oxygenase 1 | [P09601](https://www.uniprot.org/uniprot/P09601) | quercetin |
| CYP3A4 | Cytochrome P450 3A4 | [P08684](https://www.uniprot.org/uniprot/P08684) | quercetin |
| CAV1 | Caveolin-1 | [Q03135](https://www.uniprot.org/uniprot/Q03135) | quercetin |
| MYC | Myc proto-oncogene protein | [P01106](https://www.uniprot.org/uniprot/P01106) | quercetin |
| F3 | Tissue factor | [P13726](https://www.uniprot.org/uniprot/P13726) | quercetin |
| CYP1A1 | Cytochrome P450 1A1 | [P04798](https://www.uniprot.org/uniprot/P04798) | quercetin |
| ICAM1 | Intercellular adhesion molecule 1 | [P05362](https://www.uniprot.org/uniprot/P05362) | quercetin |
| IL1B | Interleukin-1 beta | [P01584](https://www.uniprot.org/uniprot/P01584) | quercetin |
| CCL2 | C-C motif chemokine 2 | [P13500](https://www.uniprot.org/uniprot/P13500) | quercetin |
| SELE | E-selectin | [P16581](https://www.uniprot.org/uniprot/P16581) | quercetin |
| VCAM1 | Vascular cell adhesion protein 1 | [P19320](https://www.uniprot.org/uniprot/P19320) | quercetin |
| BIRC5 | Baculoviral IAP repeat-containing protein 5 | [O15392](https://www.uniprot.org/uniprot/O15392) | quercetin |
| DUOX2 | Dual oxidase 2 | [Q9NRD8](https://www.uniprot.org/uniprot/Q9NRD8) | quercetin |
| NOS3 | Nitric oxide synthase, endothelial | [P29474](https://www.uniprot.org/uniprot/P29474) | quercetin |
| IL2 | Interleukin-2 | [P60568](https://www.uniprot.org/uniprot/P60568) | quercetin |
| NR1I2 | Nuclear receptor subfamily 1 group I member 2 | [O75469](https://www.uniprot.org/uniprot/O75469) | quercetin |
| CYP1B1 | Cytochrome P450 1B1 | [Q16678](https://www.uniprot.org/uniprot/Q16678) | quercetin |
| THBD | Thrombomodulin | [P07204](https://www.uniprot.org/uniprot/P07204) | quercetin |
| SERPINE1 | Plasminogen activator inhibitor 1 | [P05121](https://www.uniprot.org/uniprot/P05121) | quercetin |
| IFNG | Interferon gamma | [P01579](https://www.uniprot.org/uniprot/P01579) | quercetin |
| ALOX5 | Polyunsaturated fatty acid 5-lipoxygenase | [P09917](https://www.uniprot.org/uniprot/P09917) | quercetin, ellagic acid |
| IL1A | Interleukin-1 alpha | [P01583](https://www.uniprot.org/uniprot/P01583) | quercetin |
| MPO | Myeloperoxidase | [P05164](https://www.uniprot.org/uniprot/P05164) | quercetin |
| NCF1 | Neutrophil cytosol factor 1 | P14598 | quercetin |
| ABCG2 | Broad substrate specificity ATP-binding cassette transporter ABCG2 | [Q9UNQ0](https://www.uniprot.org/uniprot/Q9UNQ0) | quercetin |
| NFE2L2 | Nuclear factor erythroid 2-related factor 2 | [Q16236](https://www.uniprot.org/uniprot/Q16236) | quercetin |
| NQO1 | NAD(P)H dehydrogenase [quinone] 1 | [P15559](https://www.uniprot.org/uniprot/P15559) | quercetin |
| PARP1 | Poly [ADP-ribose] polymerase 1 | [P09874](https://www.uniprot.org/uniprot/P09874) | quercetin |
| AHR | Aryl hydrocarbon receptor | [P35869](https://www.uniprot.org/uniprot/P35869) | quercetin |
| CXCL2 | C-X-C motif chemokine 2 | [P19875](https://www.uniprot.org/uniprot/P19875) | quercetin |
| CHEK2 | Serine/threonine-protein kinase Chk2 | [O96017](https://www.uniprot.org/uniprot/O96017) | quercetin |
| INSR | Insulin receptor | [P06213](https://www.uniprot.org/uniprot/P06213) | quercetin, ellagic acid |
| CLDN4 | Claudin-4 | [O14493](https://www.uniprot.org/uniprot/O14493) | quercetin |
| PPARA | Peroxisome proliferator-activated receptor alpha | [Q07869](https://www.uniprot.org/uniprot/Q07869) | quercetin, poriferast-5-en-3beta-o, beta-sitosterol |
| CXCL10 | C-X-C motif chemokine 10 | [P02778](https://www.uniprot.org/uniprot/P02778) | quercetin |
| CHUK | Inhibitor of nuclear factor kappa-B kinase subunit alpha | [O15111](https://www.uniprot.org/uniprot/O15111) | quercetin |
| SPP1 | Osteopontin | [P10451](https://www.uniprot.org/uniprot/P10451) | quercetin |
| RUNX2 | Runt-related transcription factor 2 | [Q13950](https://www.uniprot.org/uniprot/Q13950) | quercetin |
| CTSD | Cathepsin D | [P07339](https://www.uniprot.org/uniprot/P07339) | quercetin |
| IGFBP3 | Insulin-like growth factor-binding protein 3 | [P17936](https://www.uniprot.org/uniprot/P17936) | quercetin |
| CD40LG | CD40 ligand | [P29965](https://www.uniprot.org/uniprot/P29965) | quercetin |
| IRF1 | Interferon regulatory factor 1 | [P10914](https://www.uniprot.org/uniprot/P10914) | quercetin |
| ERBB3 | Receptor tyrosine-protein kinase erbB-3 | [P21860](https://www.uniprot.org/uniprot/P21860) | quercetin |
| CDK2 | Cyclin-dependent kinase 2 | [P24941](https://www.uniprot.org/uniprot/P24941) | quercetin, ellagic acid |
| GSTA2 | Glutathione S-transferase A2 | [P09210](https://www.uniprot.org/uniprot/P09210) | ellagic acid |
| DRD1 | D(1A) dopamine receptor | [P21728](https://www.uniprot.org/uniprot/P21728) | beta-sitosterol |
| CHRM3 | Muscarinic acetylcholine receptor M3 | [P20309](https://www.uniprot.org/uniprot/P20309) | beta-sitosterol |
| CHRM1 | Muscarinic acetylcholine receptor M1 | [P11229](https://www.uniprot.org/uniprot/P11229) | beta-sitosterol |
| CHRM4 | Muscarinic acetylcholine receptor M4 | [P08173](https://www.uniprot.org/uniprot/P08173) | beta-sitosterol |
| PDE3A | cGMP-inhibited 3',5'-cyclic phosphodiesterase A | [Q14432](https://www.uniprot.org/uniprot/Q14432) | beta-sitosterol |
| ADRA1A | Alpha-1A adrenergic receptor | [P35348](https://www.uniprot.org/uniprot/P35348) | beta-sitosterol |
| CHRM2 | Muscarinic acetylcholine receptor M2 | [P08172](https://www.uniprot.org/uniprot/P08172) | poriferast-5-en-3beta-ol, beta-sitosterol |
| ADRA1B | Alpha-1B adrenergic receptor | [P35368](https://www.uniprot.org/uniprot/P35368) | beta-sitosterol |
| CHRNA2 | Neuronal acetylcholine receptor subunit alpha-2 | [Q15822](https://www.uniprot.org/uniprot/Q15822) | beta-sitosterol |
| CHRNA7 | Neuronal acetylcholine receptor subunit alpha-7 | [P36544](https://www.uniprot.org/uniprot/P36544) | beta-sitosterol |
| MAP2 | Microtubule-associated protein 2 | [P11137](https://www.uniprot.org/uniprot/P11137) | beta-sitosterol |
| DPEP1 | Dipeptidase 1 | [P16444](https://www.uniprot.org/uniprot/P16444) | (+)-catechin |
| PCP4 | Calmodulin regulator protein PCP4 | [P48539](https://www.uniprot.org/uniprot/P48539) | (+)-catechin |
| AKR1B1 | Aldo-keto reductase family 1 member B1 | [P15121](https://www.uniprot.org/uniprot/P15121) | quercetin, ellagic acid |
| F10 | Coagulation factor X | [P00742](https://www.uniprot.org/uniprot/P00742) | quercetin |
| F7 | Coagulation factor VII | [P08709](https://www.uniprot.org/uniprot/P08709) | quercetin |
| MAOB | Amine oxidase [flavin-containing] B | [P27338](https://www.uniprot.org/uniprot/P27338) | quercetin |
| EIF6 | Eukaryotic translation initiation factor 6 | [P56537](https://www.uniprot.org/uniprot/P56537) | quercetin |
| TNFAIP6 | Tumor necrosis factor-inducible gene 6 protein | [P98066](https://www.uniprot.org/uniprot/P98066) | quercetin |
| AHSA1 | Activator of 90 kDa heat shock protein ATPase homolog 1 | [O95433](https://www.uniprot.org/uniprot/O95433) | quercetin |
| ELK1 | ETS domain-containing protein Elk-1 | [P19419](https://www.uniprot.org/uniprot/P19419) | quercetin |
| ODC1 | Ornithine decarboxylase | [P11926](https://www.uniprot.org/uniprot/P11926) | quercetin |
| HSPA5 | Endoplasmic reticulum chaperone BiP | [P11021](https://www.uniprot.org/uniprot/P11021) | quercetin |
| ACACA | Acetyl-CoA carboxylase 1 | [Q13085](https://www.uniprot.org/uniprot/Q13085) | quercetin |
| GJA1 | Gap junction alpha-1 protein | [P17302](https://www.uniprot.org/uniprot/P17302) | quercetin |
| HSPB1 | Heat shock protein beta-1 | [P04792](https://www.uniprot.org/uniprot/P04792) | quercetin |
| CCNB1 | G2/mitotic-specific cyclin-B1 | [P14635](https://www.uniprot.org/uniprot/P14635) | quercetin |
| PLAT | Tissue-type plasminogen activator | [P00750](https://www.uniprot.org/uniprot/P00750) | quercetin |
| PSMD3 | 26S proteasome non-ATPase regulatory subunit 3 | [O43242](https://www.uniprot.org/uniprot/O43242) | quercetin |
| SLC2A4 | Solute carrier family 2, facilitated glucose transporter member 4 | [P14672](https://www.uniprot.org/uniprot/P14672) | quercetin |
| COL3A1 | Collagen alpha-1(III) chain | [P02461](https://www.uniprot.org/uniprot/P02461) | quercetin |
| CXCL11 | C-X-C motif chemokine 11 | [O14625](https://www.uniprot.org/uniprot/O14625) | quercetin |
| DCAF5 | DDB1- and CUL4-associated factor 5 | [Q96JK2](https://www.uniprot.org/uniprot/Q96JK2) | quercetin |
| NR1I3 | Nuclear receptor subfamily 1 group I member 3 | [Q14994](https://www.uniprot.org/uniprot/Q14994) | quercetin, poriferast-5-en-3beta-o, beta-sitosterol |
| PPARD | Peroxisome proliferator-activated receptor delta | [Q03181](https://www.uniprot.org/uniprot/Q03181) | quercetin, poriferast-5-en-3beta-o, beta-sitosterol |
| HSF1 | Heat shock factor protein 1 | [Q00613](https://www.uniprot.org/uniprot/Q00613) | quercetin |
| RASSF1 | Ras association domain-containing protein 1 | [Q9NS23](https://www.uniprot.org/uniprot/Q9NS23) | quercetin |
| E2F1 | Transcription factor E2F1 | [Q01094](https://www.uniprot.org/uniprot/Q01094) | quercetin |
| E2F2 | Transcription factor E2F2 | [Q14209](https://www.uniprot.org/uniprot/Q14209) | quercetin |
| ACP3 | Prostatic acid phosphatase | [P15309](https://www.uniprot.org/uniprot/P15309) | quercetin |
| DIO1 | Type I iodothyronine deiodinase | [P49895](https://www.uniprot.org/uniprot/P49895) | quercetin |
| PCOLCE | Procollagen C-endopeptidase enhancer 1 | [Q15113](https://www.uniprot.org/uniprot/Q15113) | quercetin |
| NPEPPS | Puromycin-sensitive aminopeptidase | [P55786](https://www.uniprot.org/uniprot/P55786) | quercetin |
| HK2 | Hexokinase-2 | [P52789](https://www.uniprot.org/uniprot/P52789) | quercetin |
| RASA1 | Ras GTPase-activating protein 1 | [P20936](https://www.uniprot.org/uniprot/P20936) | quercetin |

TABLE S2: The compositions of PB without bioactivity.

| MOL ID | Molecule name | Structure | OB (%) | DL |
| --- | --- | --- | --- | --- |
| MOL000105 | protocatechuic acid | 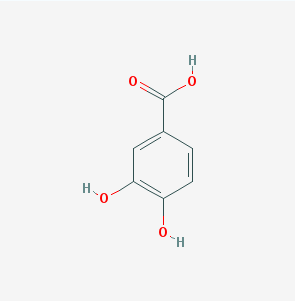 | 25.37 | 0.04 |
| MOL001952 | sinapyl alcohol | 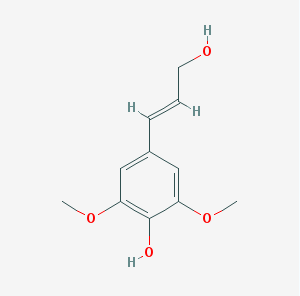 | 10.23 | 0.07 |
| MOL001955 | heriguard | 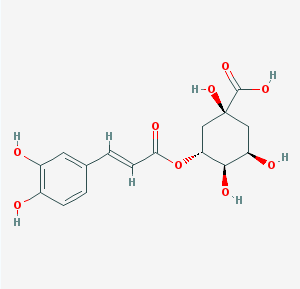 | 11.93 | 0.33 |
| MOL000223 | caffeic acid | 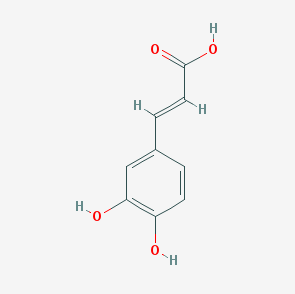 | 25.76 | 0.05 |
| MOL000346 | succinic acid | 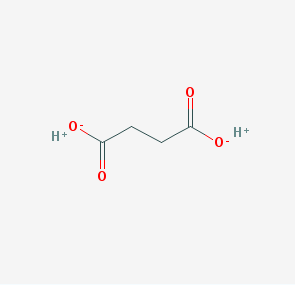 | 29.62 | 0.01 |
| MOL000347 | [syrigin](https://old.tcmsp-e.com/molecule.php?qn=347) | 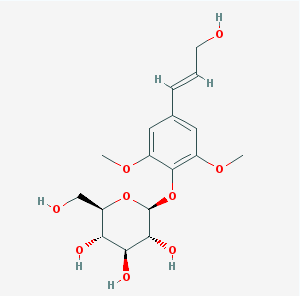 | 14.64 | 0.32 |
| MOL000415 | rutin | 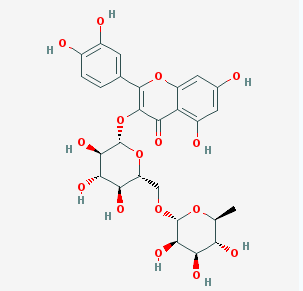 | 3.20 | 0.68 |
| MOL000508 | friedelin | 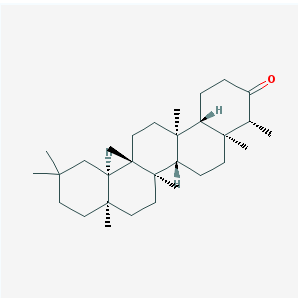 | 29.16 | 0.76 |
| MOL000513 | 3,4,5-trihydroxybenzoic acid | 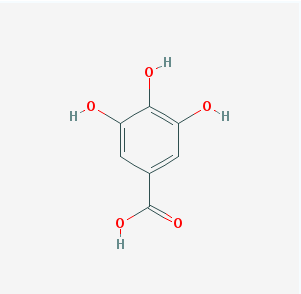 | 31.69 | 0.04 |
| MOL007950 | 3,4,5-trihydroxybenzoate | 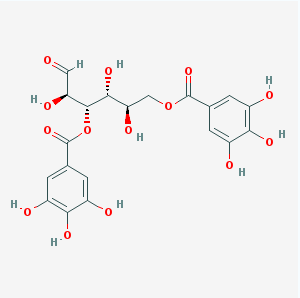 | 2.99 | 0.56 |
| MOL007951 | 6-O-Galloylglucose | 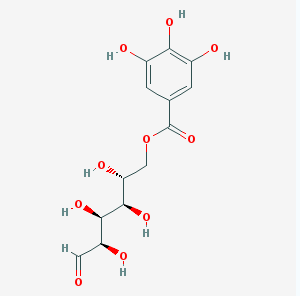 | 17.19 | 0.23 |
| MOL004368 | hyperin | 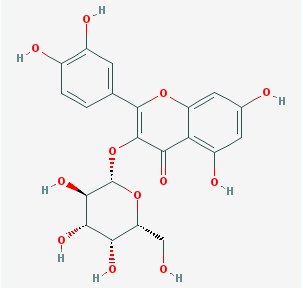 | 6.94 | 0.77 |
| MOL007953 | hyperin _qt | 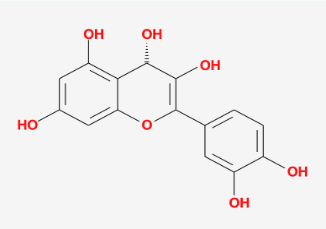 | 1.43 | 0.27 |
| MOL007954 | GRE | 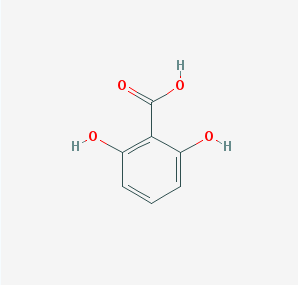 | 75.40 | 0.04 |
| MOL007955 | 24-Methyl enecyclo artanone | 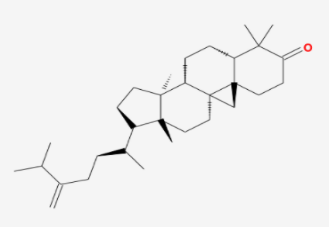 | 9.29 | 0.79 |

TABLE S3: The UC associated targets.

| Geen name | Database | Geen name | Database | Geen name | Database | Geen name | Database |
| --- | --- | --- | --- | --- | --- | --- | --- |
| ABCB1 | Geencards, OMIM, Drugbank | ATG16L1 | Geencards, OMIM | REG4 | Geencards, OMIM | NR3C1 | Geencards, Drugbank |
| TNF | Geencards, OMIM, TTD | CDH1 | Geencards, OMIM | SIRT1 | Geencards, OMIM | CYP3A4 | Geencards, Drugbank |
| IL22 | Geencards, OMIM, TTD | TNFRSF1B | Geencards, OMIM | MAP3K7 | Geencards, OMIM | PTGS1 | Geencards, Drugbank |
| SMAD7 | Geencards, OMIM, TTD | CCND1 | Geencards, OMIM | BUB1B | Geencards, OMIM | CYP3A5 | Geencards, Drugbank |
| IL6 | Geencards, OMIM | FCGR2A | Geencards, OMIM | PLCG2 | Geencards, OMIM | CYP1B1 | Geencards, Drugbank |
| TP53 | Geencards, OMIM | NFKB1 | Geencards, OMIM | IL37 | Geencards, OMIM | CYP2C9 | Geencards, Drugbank |
| NOD2 | Geencards, OMIM | STAT4 | Geencards, OMIM | IL18R1 | Geencards, OMIM | CYP2C19 | Geencards, Drugbank |
| HLA-B | Geencards, OMIM | EP300 | Geencards, OMIM | PTCH1 | Geencards, OMIM | ALB | Geencards, Drugbank |
| IL1RN | Geencards, OMIM | IRGM | Geencards, OMIM | MUC12 | Geencards, OMIM | ABCB11 | Geencards, Drugbank |
| IL23R | Geencards, OMIM | SLC22A5 | Geencards, OMIM | SLC28A2 | PharmGkb, Drugbank | ABCG2 | Geencards, Drugbank |
| CTNNB1 | Geencards, OMIM | BRAF | Geencards, OMIM | SLC28A3 | PharmGkb, Drugbank | CYP2D6 | Geencards, Drugbank |
| TLR2 | Geencards, OMIM | IL12B | Geencards, OMIM | SLC29A1 | PharmGkb, Drugbank | NOS2 | Geencards, Drugbank |
| AKT1 | Geencards, OMIM | TNFSF15 | Geencards, OMIM | SLC29A2 | PharmGkb, Drugbank | ABCC2 | Geencards, Drugbank |
| WAS | Geencards, OMIM | MUC2 | Geencards, OMIM | STAT3 | Geencards, TTD | CYP1A1 | Geencards, Drugbank |
| BAX | Geencards, OMIM | MUC1 | Geencards, OMIM | ICAM1 | Geencards, TTD | CYP2E1 | Geencards, Drugbank |
| CHEK2 | Geencards, OMIM | FCGR3B | Geencards, OMIM | IL13 | Geencards, TTD | NR1I2 | Geencards, Drugbank |
| FGFR3 | Geencards, OMIM | CARD9 | Geencards, OMIM | CCL11 | Geencards, TTD | TPMT | Geencards, Drugbank |
| IL10RA | Geencards, OMIM | SRC | Geencards, OMIM | CXCL10 | Geencards, TTD | XDH | Geencards, Drugbank |
| IL18 | Geencards, OMIM | CYBC1 | Geencards, OMIM | MTOR | Geencards, TTD | HPRT1 | Geencards, Drugbank |
| IRF5 | Geencards, OMIM | DEFB4A | Geencards, OMIM | CXCR2 | Geencards, TTD | PTGS2 | Geencards, Drugbank |
| SMAD4 | Geencards, OMIM | PLA2G2A | Geencards, OMIM | IL12A | Geencards, TTD | PPARG | Geencards, Drugbank |
| PIK3CA | Geencards, OMIM | MUC5AC | Geencards, OMIM | ATP4A | Geencards, TTD | CHUK | Geencards, Drugbank |
| APC | Geencards, OMIM | MASP2 | Geencards, OMIM | ITGA4 | Geencards, TTD | IKBKB | Geencards, Drugbank |
| IL10RB | Geencards, OMIM | CARD8 | Geencards, OMIM | RIPK1 | Geencards, TTD | ALOX5 | Geencards, Drugbank |
| INAVA | Geencards, OMIM | STAT6 | Geencards, OMIM | CXCR1 | Geencards, TTD | MPO | Geencards, Drugbank |
| NRAS | Geencards, OMIM | NOD1 | Geencards, OMIM | CDK4 | Geencards, TTD | IFNG | Geencards, Drugbank |
| CARD11 | Geencards, OMIM | BUB1 | Geencards, OMIM | CDK6 | Geencards, TTD | BGLAP | Geencards, Drugbank |
| BACH2 | Geencards, OMIM | HPS1 | Geencards, OMIM | CCR9 | Geencards, TTD | FGF2 | Geencards |
| IL10 | Geencards | TNFAIP3 | Geencards | NCF4 | Geencards | DPYD | Geencards |
| ELANE | Geencards | IFNA1 | Geencards | ACE2 | Geencards | KLRK1 | Geencards |
| JAK2 | Geencards | BTNL2 | Geencards | RFXAP | Geencards | CHI3L1 | Geencards |
| IL1B | Geencards | VCAM1 | Geencards | PECAM1 | Geencards | MIR222 | Geencards |
| RUNX1 | Geencards | CDKN1B | Geencards | IL6ST | Geencards | CLDN18 | Geencards |
| HLA-DRB1 | Geencards | TIMP1 | Geencards | IFNGR1 | Geencards | SMARCA4 | Geencards |
| CEBPA | Geencards | MIR34A | Geencards | PMS2 | Geencards | PNP | Geencards |
| CRP | Geencards | STAT5A | Geencards | IL33 | Geencards | IL18BP | Geencards |
| KIT | Geencards | LEPR | Geencards | FCGR2B | Geencards | CASP10 | Geencards |
| JAK3 | Geencards | TCF3 | Geencards | TRB | Geencards | SMARCB1 | Geencards |
| TLR4 | Geencards | CD40 | Geencards | IL17F | Geencards | CD38 | Geencards |
| CXCL8 | Geencards | CXCL12 | Geencards | PLAU | Geencards | RAD51 | Geencards |
| ADA | Geencards | MDM2 | Geencards | MYO9B | Geencards | RBP4 | Geencards |
| IL7R | Geencards | CALCA | Geencards | MIR27A | Geencards | TOR1A | Geencards |
| KRAS | Geencards | IFIH1 | Geencards | CXCR3 | Geencards | CD163 | Geencards |
| ETV6 | Geencards | SOD1 | Geencards | PON1 | Geencards | SFTPD | Geencards |
| RAG1 | Geencards | VDR | Geencards | NQO1 | Geencards | ISG15 | Geencards |
| PTPRC | Geencards | HGF | Geencards | TF | Geencards | MALAT1 | Geencards |
| TERT | Geencards | HLA-DQA1 | Geencards | PIK3R1 | Geencards | ANGPT2 | Geencards |
| KMT2A | Geencards | FCGR3A | Geencards | HSPD1 | Geencards | HLA-DPA1 | Geencards |
| IL2 | Geencards | CD34 | Geencards | RB1 | Geencards | ACHE | Geencards |
| MEFV | Geencards | ITGAM | Geencards | BIRC5 | Geencards | BMP6 | Geencards |
| IL4 | Geencards | NHEJ1 | Geencards | MIR127 | Geencards | CDK2 | Geencards |
| DCLRE1C | Geencards | RNASE3 | Geencards | CD86 | Geencards | CACNA1S | Geencards |
| MECP2 | Geencards | GATA3 | Geencards | RUNX2 | Geencards | LYN | Geencards |
| DNMT3A | Geencards | CXCR4 | Geencards | LAMB1 | Geencards | KRT18 | Geencards |
| IKZF1 | Geencards | KITLG | Geencards | PARP1 | Geencards | NDRG1 | Geencards |
| MIR126 | Geencards | PRF1 | Geencards | MCL1 | Geencards | KRT7 | Geencards |
| TGFB1 | Geencards | MIR15A | Geencards | CD19 | Geencards | CCL4 | Geencards |
| TET2 | Geencards | SELP | Geencards | CST3 | Geencards | S100B | Geencards |
| CTLA4 | Geencards | ICOSLG | Geencards | CXCL9 | Geencards | KDM4C | Geencards |
| VEGFA | Geencards | MECOM | Geencards | CD247 | Geencards | CD274 | Geencards |
| IL17A | Geencards | SOCS1 | Geencards | HLA-DPB1 | Geencards | GGT1 | Geencards |
| HLA-A | Geencards | SELE | Geencards | MIR17 | Geencards | COL17A1 | Geencards |
| PTEN | Geencards | GSTP1 | Geencards | NCF1 | Geencards | IDO1 | Geencards |
| CDKN2A | Geencards | PDGFRA | Geencards | IRF1 | Geencards | TREX1 | Geencards |
| ZAP70 | Geencards | CASP3 | Geencards | LGALS3 | Geencards | PSMB8 | Geencards |
| IL2RG | Geencards | POMC | Geencards | FBXW7 | Geencards | PKHD1 | Geencards |
| RAG2 | Geencards | ERBB2 | Geencards | CYP1A2 | Geencards | UBAC2 | Geencards |
| F2 | Geencards | CD79A | Geencards | CREB1 | Geencards | CDK1 | Geencards |
| INSL6 | Geencards | CCR3 | Geencards | WRN | Geencards | LRBA | Geencards |
| NSD1 | Geencards | CARMIL2 | Geencards | DHFR | Geencards | GSN | Geencards |
| FAS | Geencards | ADAMTS13 | Geencards | CAV1 | Geencards | MLN | Geencards |
| NBN | Geencards | CFI | Geencards | PRKN | Geencards | IL12RB1 | Geencards |
| ACE | Geencards | REN | Geencards | XRCC1 | Geencards | FLG | Geencards |
| STAT5B | Geencards | HMGB1 | Geencards | LMO2 | Geencards | FANCC | Geencards |
| IDH2 | Geencards | NGF | Geencards | NAGLU | Geencards | HSP90AA1 | Geencards |
| RTEL1 | Geencards | CD28 | Geencards | EZH2 | Geencards | PLA2G6 | Geencards |
| IDH1 | Geencards | CALR | Geencards | PPOX | Geencards | MIR106B | Geencards |
| CCL2 | Geencards | S100A12 | Geencards | RUNX3 | Geencards | GLI3 | Geencards |
| ABL1 | Geencards | MT-ND1 | Geencards | ARID1A | Geencards | TGFBR1 | Geencards |
| MMP9 | Geencards | LACC1 | Geencards | IFNB1 | Geencards | IGFBP3 | Geencards |
| SYK | Geencards | CD36 | Geencards | SOD2 | Geencards | RAD21 | Geencards |
| MMP1 | Geencards | DMD | Geencards | CEBPB | Geencards | TGFBR2 | Geencards |
| CSF3 | Geencards | MET | Geencards | AGER | Geencards | PTPN6 | Geencards |
| BRCA2 | Geencards | INSR | Geencards | IL9 | Geencards | MIR34C | Geencards |
| CCR6 | Geencards | IL6R | Geencards | APOA1 | Geencards | SFTPA2 | Geencards |
| CASR | Geencards | SEPTIN9 | Geencards | MT-ND4 | Geencards | FGF23 | Geencards |
| F5 | Geencards | HRH2 | Geencards | MIR221 | Geencards | MIR199A1 | Geencards |
| MIR155 | Geencards | MT-CO1 | Geencards | GUSB | Geencards | DEFB1 | Geencards |
| MTHFR | Geencards | MME | Geencards | TAC1 | Geencards | CFHR1 | Geencards |
| IL2RA | Geencards | GPR35 | Geencards | NR1H4 | Geencards | OTC | Geencards |
| INS | Geencards | MIR16-1 | Geencards | CTSD | Geencards | TNFRSF9 | Geencards |
| CD4 | Geencards | CCL3 | Geencards | MAP2K1 | Geencards | LOC110806262 | Geencards |
| FOXP3 | Geencards | GHRL | Geencards | DUOX2 | Geencards | FERMT1 | Geencards |
| CSF2 | Geencards | MIR146A | Geencards | ZFP90 | Geencards | WNT7A | Geencards |
| HLA-C | Geencards | BPI | Geencards | ANPEP | Geencards | DEFA5 | Geencards |
| HLA-DQB1 | Geencards | COL1A1 | Geencards | ATP12A | Geencards | PTH | Geencards |
| ACTB | Geencards | NF1 | Geencards | CXCL5 | Geencards | CHEK1 | Geencards |
| RTEL1-TNFRSF6B | Geencards | RET | Geencards | XRCC4 | Geencards | TFF1 | Geencards |
| STAT1 | Geencards | FLT1 | Geencards | RETN | Geencards | DOCK8 | Geencards |
| APOE | Geencards | IL23A | Geencards | DSP | Geencards | HSPG2 | Geencards |
| G6PC3 | Geencards | IL2RB | Geencards | PDGFB | Geencards | TOP2A | Geencards |
| NLRP3 | Geencards | SERPINA3 | Geencards | NR1H2 | Geencards | AUTS2 | Geencards |
| TNFRSF1A | Geencards | HNF4A | Geencards | AGT | Geencards | SPI1 | Geencards |
| MIR223 | Geencards | PRSS1 | Geencards | MIR143 | Geencards | SOX2 | Geencards |
| PTPN11 | Geencards | ERCC2 | Geencards | IRF8 | Geencards | LBR | Geencards |
| SLC17A5 | Geencards | APOH | Geencards | MIR140 | Geencards | MIR122 | Geencards |
| XIAP | Geencards | BDNF | Geencards | TRPV4 | Geencards | TJP1 | Geencards |
| MYC | Geencards | CCK | Geencards | SCT | Geencards | AKR1D1 | Drugbank |
| HP | Geencards | H19 | Geencards | IL1RAPL2 | Geencards | SRD5A2 | Drugbank |
| LMNA | Geencards | CSF1 | Geencards | GSTT1 | Geencards | HSD3B1 | Drugbank |
| ATM | Geencards | S100A9 | Geencards | SERPINF2 | Geencards | SLC22A8 | Drugbank |
| SRP54 | Geencards | H2AC18 | Geencards | CTSB | Geencards | SCN10A | Drugbank |
| TCF4 | Geencards | TLR5 | Geencards | MAPK3 | Geencards | PTGER1 | Drugbank |
| SERPINC1 | Geencards | ANXA5 | Geencards | UCN | Geencards | CYP11B1 | Drugbank |
| TLR3 | Geencards | TLR9 | Geencards | CYCS | Geencards | HSD11B2 | Drugbank |
| MTM1 | Geencards | SLC19A1 | Geencards | MAPK14 | Geencards | AOX1 | Drugbank |
| MSH2 | Geencards | BLM | Geencards | NFE2L2 | Geencards | PPAT | Drugbank |
| IL1R1 | Geencards | MVK | Geencards | LBP | Geencards | IMPDH1 | Drugbank |
| CCL5 | Geencards | BTK | Geencards | LAMC2 | Geencards | IMPDH2 | Drugbank |
| THBD | Geencards | FKRP | Geencards | MIR145 | Geencards | CYP4A11 | Drugbank |
| LIG4 | Geencards | NCAM1 | Geencards | MAPK8 | Geencards | nat | Drugbank |
| IL1A | Geencards | RFXANK | Geencards | ARID1B | Geencards | NAT1 | Drugbank |
| CIITA | Geencards | ITGB3 | Geencards | SMPD1 | Geencards | AKR1C1 | Drugbank |
| MLH1 | Geencards | CCN2 | Geencards | SLC37A4 | Geencards | AKR1C2 | Drugbank |
| PRTN3 | Geencards | LCK | Geencards | GZMB | Geencards | AKR1C3 | Drugbank |
| LEP | Geencards | CPOX | Geencards | PLAUR | Geencards | AKR1C4 | Drugbank |
| JAK1 | Geencards | GNAS | Geencards | TNFSF10 | Geencards | CYP17A1 | Drugbank |
| MIF | Geencards | CD44 | Geencards | MIR142 | Geencards | GGCX | Drugbank |
| MIR210 | Geencards | ENG | Geencards | SAA1 | Geencards | NR0B1 | Drugbank |
| LCN2 | Geencards | ITGB4 | Geencards | ERBB3 | Geencards | CYP4F2 | Drugbank |
| FASLG | Geencards | SELL | Geencards | TYMS | Geencards | VKORC1 | Drugbank |
| SERPINE1 | Geencards | MB | Geencards | ERCC1 | Geencards | MC2R | Drugbank |
| MIR34B | Geencards | MAPK1 | Geencards | IRF7 | Geencards | BCHE | Drugbank |
| CD40LG | Geencards | PDCD1 | Geencards | CACNA1G | Geencards | ABCC4 | Drugbank |
| MIR203A | Geencards | IL4R | Geencards | ITGAX | Geencards | ABCC5 | Drugbank |
| IL3 | Geencards | NFKBIA | Geencards | MIR125A | Geencards | ANXA1 | Drugbank |
| CFTR | Geencards | KNG1 | Geencards | PALB2 | Geencards | CYP3A43 | Drugbank |
| PRKCQ | Geencards | TICAM1 | Geencards | HDAC9 | Geencards | SLCO1A2 | Drugbank |
| MIR204 | Geencards | ERAP1 | Geencards | CXCL1 | Geencards | SERPINA6 | Drugbank |
| IRF3 | Geencards | REL | Geencards | CR1 | Geencards | CYP2B6 | Drugbank |
| HMOX1 | Geencards | SLC22A4 | Geencards | TREM1 | Geencards | CYP2C8 | Drugbank |
| CREBBP | Geencards | MIR29A | Geencards | ABCB4 | Geencards | CYP3A7 | Drugbank |
| VWF | Geencards | CBL | Geencards | APOB | Geencards | CYP2A6 | Drugbank |
| RELA | Geencards | KIR3DL1 | Geencards | VIP | Geencards | CYP19A1 | Drugbank |
| FGFR1 | Geencards | CHAT | Geencards | ITGB1 | Geencards | HSD11B1 | Drugbank |
| PLA2G4A | Geencards | KDR | Geencards | INPP5D | Geencards | SHBG | Drugbank |
| NOTCH1 | Geencards | ADORA2A | Geencards | TYK2 | Geencards | CYP11B2 | Drugbank |
| SST | Geencards | TFRC | Geencards | SCYL1 | Geencards | CLEC7A | OMIM |
| HRAS | Geencards | CASP1 | Geencards | CD27 | Geencards | NFKBIZ | OMIM |
| CDKN1A | Geencards | PTX3 | Geencards | AR | Geencards | PTCH2 | OMIM |
| CD8A | Geencards | SPINK1 | Geencards | TNFRSF11B | Geencards | SUFU | OMIM |
| LTA | Geencards | IL11 | Geencards | CRH | Geencards | CLCN5 | OMIM |
| MYB | Geencards | CD80 | Geencards | SLC2A1 | Geencards | PORCN | OMIM |
| F3 | Geencards | DNMT1 | Geencards | CDKN2B-AS1 | Geencards | CELIAC8 | OMIM |
| MIR21 | Geencards | CHGA | Geencards | SOCS3 | Geencards | GNAI2 | OMIM |
| PLG | Geencards | HLA-G | Geencards | HSPA4 | Geencards | TNFSF14 | OMIM |
| EGF | Geencards | NR3C2 | Geencards | IGF1R | Geencards | CYGB | OMIM |
| LTF | Geencards | PRKCD | Geencards | GAPDH | Geencards | IL17REL | OMIM |
| CDKN2B | Geencards | CASP9 | Geencards | LEF1 | Geencards | ABCB6 | OMIM |
| MIR320A | Geencards | TP73 | Geencards | NEU1 | Geencards | MCC | OMIM |
| IL21 | Geencards | DNMT3B | Geencards | IFNA2 | Geencards | PTPN12 | OMIM |
| GPT | Geencards | HAMP | Geencards | CD55 | Geencards | AD | OMIM |
| GSTM1 | Geencards | CLN3 | Geencards | UGT1A1 | Geencards | PDGFRL | OMIM |
| G6PD | Geencards | BSG | Geencards | CLDN2 | Geencards | MLH3 | OMIM |
| IL15 | Geencards | COMT | Geencards | MIR451A | Geencards | FLCN | OMIM |
| SETD2 | Geencards | CYBB | Geencards | TFF3 | Geencards | AXIN2 | OMIM |
| IGF2 | Geencards | MYD88 | Geencards | TAP1 | Geencards | DCC | OMIM |
| CCR5 | Geencards | TAP2 | Geencards | HLA-DRA | Geencards | AURKA | OMIM |
| PTPN22 | Geencards | KLRC4 | Geencards | DPP4 | Geencards | POLA1 | OMIM |
| MYH11 | Geencards | FCGR1A | Geencards | NAT2 | Geencards | SH3TC2 | OMIM |
| SLC6A4 | Geencards | AK2 | Geencards | IGHE | Geencards | SIAE | OMIM |
| CAT | Geencards | POLD1 | Geencards | FUT2 | Geencards | STUB1 | OMIM |
| IL5 | Geencards | GRP | Geencards | IGFBP2 | Geencards | RPL35 | OMIM |
| PSTPIP1 | Geencards | MAPT | Geencards | NTS | Geencards | ITGAV | OMIM |
| BCL2 | Geencards | MTR | Geencards | PF4 | Geencards | TWIST1 | OMIM |
| CTSG | Geencards | FGF7 | Geencards | SKIV2L | Geencards | MUC3A | OMIM |
| MST1 | Geencards | PLA2G7 | Geencards | HNMT | Geencards | REG1A | OMIM |
| CFH | Geencards | SLC9A3 | Geencards | HTR2A | Geencards | MUC5B | OMIM |
| MMP2 | Geencards | PRODH | Geencards | CYBA | Geencards | IL18RAP | OMIM |
| SERPINA1 | Geencards | EPX | Geencards | LOX | Geencards | CCL28 | OMIM |
| GAST | Geencards | MMP8 | Geencards | TACR1 | Geencards | MUC3B | OMIM |
| C3 | Geencards | GCG | Geencards | FGF10 | Geencards | EPN3 | OMIM |
| SLC11A1 | Geencards | CX3CR1 | Geencards | TCF7L2 | Geencards | NDUFA13 | OMIM |
| CFB | Geencards | TTC7A | Geencards | SHH | Geencards | ORMDL3 | OMIM |
| CP | Geencards | MT-CO2 | Geencards | TOP1 | Geencards | MUC20 | OMIM |
| GBA | Geencards | FHIT | Geencards | SAA4 | Geencards | MUC13 | OMIM |
| IGF1 | Geencards | CYLD | Geencards | MIR150 | Geencards | MUC17 | OMIM |
| HIF1A | Geencards | TEK | Geencards | TH | Geencards | OLFM4 | OMIM |
| FGFR2 | Geencards | DDX58 | Geencards | PPARA | Geencards | LYPD8 | OMIM |
| BCL10 | Geencards | MICA | Geencards | TIMP2 | Geencards | DLC1 | OMIM |
| ERCC6 | Geencards | RHOA | Geencards | IRS1 | Geencards | COX-1 | TTD |
| EGFR | Geencards | CXCL2 | Geencards | RPS6KB1 | Geencards | S1PR1 | TTD |
| MBL2 | Geencards | IFITM3 | Geencards | STXBP2 | Geencards | ITGB7 | TTD |
| U2AF1 | Geencards | TCN2 | Geencards | BCL2L11 | Geencards | JAK-1 | TTD |
| IL7 | Geencards | TGM2 | Geencards | ANGPT1 | Geencards | ATIII | TTD |
| ITGB2 | Geencards | AHSG | Geencards | TNFRSF8 | Geencards | GUCY2C | TTD |
| NOS3 | Geencards | MIR378A | Geencards | F13A1 | Geencards | H2R | TTD |
| CD14 | Geencards | AHR | Geencards | LAMB3 | Geencards | IL23 | TTD |
| S100A8 | Geencards | SDHA | Geencards | MIR141 | Geencards | CELA1 | TTD |
| NTRK1 | Geencards | MT-ND4L | Geencards | GPX1 | Geencards | PD-1 | TTD |
| EPO | Geencards | EPCAM | Geencards | MIR424 | Geencards | COX | TTD |
| ESR1 | Geencards | TRG | Geencards | INPP5E | Geencards | Proton | TTD |
| C4A | Geencards | HDAC1 | Geencards | TLR7 | Geencards | pump | TTD |
| BRCA1 | Geencards | F2RL1 | Geencards | MMP7 | Geencards | MMP-9 | TTD |
| MSH6 | Geencards | GJB6 | Geencards | MIR18A | Geencards | NE | TTD |
| SNX27 | Geencards | MEIS1 | Geencards | MMP13 | Geencards | S6K1 | TTD |
| JUN | Geencards | NLRP12 | Geencards | C1S | Geencards | PTGER4 | TTD |
| RUNX1T1 | Geencards | SLPI | Geencards | GSR | Geencards | IL13RA2 | TTD |
| LPL | Geencards | SOX9 | Geencards | ENO2 | Geencards | MADCAM1 | TTD |
| ADIPOQ | Geencards | MIR22 | Geencards | ADM | Geencards | NFKB | TTD |
| FN1 | Geencards | CLDN4 | Geencards | HERC2 | Geencards | TNF-R1 | TTD |
| TRAF3 | Geencards | DSG1 | Geencards | C4B | Geencards | ITGA4/B1 | TTD |
| SPP1 | Geencards | COL4A5 | Geencards | CCL20 | Geencards | Bact | TTD |
| SMAD3 | Geencards | CCNA2 | Geencards | SIGLEC5 | Geencards | FimH | TTD |
| PROM1 | Geencards | CDX2 | Geencards | ARG1 | Geencards | PDE4 | TTD |
| IKBKG | Geencards | OPRM1 | Geencards | CRHR2 | Geencards | PTK | TTD |
| EDN1 | Geencards | GDNF | Geencards | LIF | Geencards | OR | TTD |
| MMP3 | Geencards | POLE | Geencards | SMAD2 | Geencards | MCR | TTD |
| MT-CYB | Geencards | IFNG-AS1 | Geencards | TAPBP | Geencards | ATPase | TTD |
| ALDH2 | Geencards | TGFB2 | Geencards | POU5F1 | Geencards | PDF | TTD |
| SH2D1A | Geencards | NOS1 | Geencards | PPIG | Geencards | CCKBR | TTD |
| CD209 | Geencards | ABCA1 | Geencards | ATRIP | Geencards | JAK-3 | TTD |
| CD46 | Geencards | FOXO3 | Geencards | PCNA | Geencards | BTG2 | PharmGkb |
| ABCC1 | Geencards | ADAM17 | Geencards | RNASEH2C | Geencards | C4orf54 | PharmGkb |
| FOS | Geencards | TFF2 | Geencards | BMI1 | Geencards | MPL | PharmGkb |
| KIF1A | Geencards | DRD2 | Geencards | MTMR2 | Geencards | THPO | PharmGkb |
| BCL2L1 | Geencards | RAF1 | Geencards | KRT8 | Geencards | BTG1 | PharmGkb |
| RFX5 | Geencards | HAVCR2 | Geencards | PIK3CD | Geencards | HCG22 | PharmGkb |
| CCR1 | Geencards | PTPN2 | Geencards | DLD | Geencards | MUCL3 | PharmGkb |
| CD3D | Geencards | CASP8 | Geencards | LRRK2 | Geencards | MUC22 | PharmGkb |
| ITGAL | Geencards | PYY | Geencards | CCND2 | Geencards | SLC28A1 | PharmGkb |
| FOXP1 | Geencards | B2M | Geencards | EGR2 | Geencards | SLC29A3 | PharmGkb |
| SERPINF1 | Geencards | PDGFRB | Geencards | PIK3CG | Geencards | SLC29A4 | PharmGkb |
| ANTXR2 | Geencards | ADSL | Geencards |  |  |  |  |

TABLE S4: The overlapping targets of PB and UC.

| Geen name | Protein name | Uniprot ID | Degree | Compositions of PB |
| --- | --- | --- | --- | --- |
| ESR1 | Estrogen receptor | [P03372](https://www.uniprot.org/uniprot/P03372) | 60 | (+)-catechin, ellagic acid, poriferast-5-en-3beta-ol, beta-sitosterol |
| AR | Androgen receptor | [P10275](https://www.uniprot.org/uniprot/P10275) | 36 | quercetin, ellagic acid, poriferast-5-en-3beta-ol, beta-sitosterol |
| HSP90AA1 | Heat shock protein HSP 90-alpha | [P07900](https://www.uniprot.org/uniprot/P07900) | 57 | (+)-catechin, quercetin, ellagic acid, beta-sitosterol |
| RELA | Transcription factor p65 | [Q04206](https://www.uniprot.org/uniprot/Q04206) | 43 | quercetin, ellagic acid |
| CDKN1A | Cyclin-dependent kinase inhibitor 1 | [P38936](https://www.uniprot.org/uniprot/P38936) | 39 | quercetin, ellagic acid |
| MMP2 | 72 kDa type IV collagenase | [P08253](https://www.uniprot.org/uniprot/P08253) | 50 | quercetin, ellagic acid |
| MMP9 | Matrix metalloproteinase-9 | [P14780](https://www.uniprot.org/uniprot/P14780) | 62 | quercetin, ellagic acid |
| NFKBIA | NF-kappa-B inhibitor alpha | [P25963](https://www.uniprot.org/uniprot/P25963) | 48 | quercetin, ellagic acid |
| CXCL8 | Ubiquitin carboxyl-terminal hydrolase 17 | [Q6R6M4](https://www.uniprot.org/uniprot/Q6R6M4) | 60 | quercetin, ellagic acid |
| IGF2 | Insulin-like growth factor 1 receptor | [P08069](https://www.uniprot.org/uniprot/P08069) | 26 | quercetin, ellagic acid |
| GSTM1 | Putative endogenous retrovirus group K member 11-1 Env polyprotein | [P61568](https://www.uniprot.org/uniprot/P61568) | 13 | quercetin, ellagic acid |
| PTGS2 | Prostaglandin G/H synthase 2 | [P35354](https://www.uniprot.org/uniprot/P35354) | 64 | (+)-catechin, quercetin, ellagic acid, ZINC04073977, beta-sitosterol |
| PTGS1 | Prostaglandin G/H synthase 1 | [P23219](https://www.uniprot.org/uniprot/P23219) | 10 | (+)-catechin, quercetin, beta-sitosterol |
| SLC6A4 | Sodium-dependent serotonin transporter | [P31645](https://www.uniprot.org/uniprot/P31645) | 5 | poriferast-5-en-3beta-ol, beta-sitosterol |
| OPRM1 | Mu-type opioid receptor | [P35372](https://www.uniprot.org/uniprot/P35372) | 4 | beta-sitosterol |
| BCL2 | Apoptosis regulator Bcl-2 | [P10415](https://www.uniprot.org/uniprot/P10415) | 47 | quercetin, beta-sitosterol |
| BAX | Apoptosis regulator BAX | [Q07812](https://www.uniprot.org/uniprot/Q07812) | 20 | quercetin, beta-sitosterol |
| CASP9 | Caspase-9 | [P55211](https://www.uniprot.org/uniprot/P55211) | 41 | quercetin, beta-sitosterol |
| JUN | Transcription factor AP-1 | [P05412](https://www.uniprot.org/uniprot/P05412) | 67 | quercetin, beta-sitosterol |
| CASP3 | Caspase-3 | [P42574](https://www.uniprot.org/uniprot/Q14790) | 68 | quercetin, beta-sitosterol |
| CASP8 | Caspase-8 | [Q14790](https://www.uniprot.org/uniprot/Q14790) | 50 | quercetin, beta-sitosterol |
| PON1 | Serum paraoxonase/arylesterase 1 | [P27169](https://www.uniprot.org/uniprot/P27169) | 11 | quercetin, beta-sitosterol |
| PPARG | Peroxisome proliferator-activated receptor gamma | [P37231](https://www.uniprot.org/uniprot/P37231) | 57 | quercetin, poriferast-5-en-3beta-o, beta-sitosterol |
| DPP4 | Dipeptidyl peptidase 4 | [P27487](https://www.uniprot.org/uniprot/P27487) | 20 | quercetin |
| PRSS1 | Trypsin-1 | [P07477](https://www.uniprot.org/uniprot/P07477) | 4 | quercetin |
| TOP2A | DNA topoisomerase 2-alpha | [P11388](https://www.uniprot.org/uniprot/P11388) | 16 | quercetin |
| F2 | Prothrombin | [P00734](https://www.uniprot.org/uniprot/P00734) | 22 | quercetin |
| MMP3 | Stromelysin-1 | [P08254](https://www.uniprot.org/uniprot/P08254) | 36 | quercetin |
| ACHE | Acetylcholinesterase | [P22303](https://www.uniprot.org/uniprot/P22303) | 8 | quercetin, poriferast-5-en-3beta-o, beta-sitosterol |
| EGFR | Epidermal growth factor receptor | [P00533](https://www.uniprot.org/uniprot/P00533) | 60 | quercetin, ellagic acid |
| AKT1 | RAC-alpha serine/threonine-protein kinase | [P31749](https://www.uniprot.org/uniprot/P31749) | 78 | quercetin, ellagic acid |
| CCND1 | G1/S-specific cyclin-D1 | [P24385](https://www.uniprot.org/uniprot/P24385) | 56 | quercetin |
| BCL2L1 | Bcl-2-like protein 1 | [Q07817](https://www.uniprot.org/uniprot/Q07817) | 47 | quercetin |
| FOS | Proto-oncogene c-Fos | [P01100](https://www.uniprot.org/uniprot/P01100) | 56 | quercetin |
| PLAU | Urokinase-type plasminogen activator | [P00749](https://www.uniprot.org/uniprot/P00749) | 29 | quercetin |
| MAPK1 | Mitogen-activated protein kinase 1 | [P28482](https://www.uniprot.org/uniprot/P28482) | 41 | quercetin |
| IL10RB | Interleukin-10 receptor subunit beta | [Q08334](https://www.uniprot.org/uniprot/Q08334) | 7 | quercetin |
| RB1 | Retinoblastoma-associated protein | [P06400](https://www.uniprot.org/uniprot/P06400) | 28 | quercetin |
| IL6ST | Interleukin-6 receptor subunit beta | [P40189](https://www.uniprot.org/uniprot/P40189) | 7 | quercetin |
| TP53 | Cellular tumor antigen p53 | [P04637](https://www.uniprot.org/uniprot/P04637) | 75 | quercetin |
| TOP1 | DNA topoisomerase 1 | [P11387](https://www.uniprot.org/uniprot/P11387) | 20 | quercetin |
| RAF1 | RAF proto-oncogene serine/threonine-protein kinase | [P04049](https://www.uniprot.org/uniprot/P04049) | 24 | quercetin |
| SOD1 | Superoxide dismutase [Cu-Zn] | [P00441](https://www.uniprot.org/uniprot/P00441) | 21 | quercetin |
| MMP1 | Interstitial collagenase | [P03956](https://www.uniprot.org/uniprot/P03956) | 34 | quercetin |
| HIF1A | Hypoxia-inducible factor 1-alpha | [Q16665](https://www.uniprot.org/uniprot/Q16665) | 63 | quercetin |
| STAT1 | Signal transducer and activator of transcription 1-alpha/beta | [P42224](https://www.uniprot.org/uniprot/P42224) | 43 | quercetin |
| RUNX1T1 | Protein CBFA2T1 | [Q06455](https://www.uniprot.org/uniprot/Q06455) | 2 | quercetin |
| CDK1 | Cyclin-dependent kinase 1 | [P06493](https://www.uniprot.org/uniprot/P06493) | 25 | quercetin |
| ERBB2 | Receptor tyrosine-protein kinase erbB-2 | [P04626](https://www.uniprot.org/uniprot/P04626) | 49 | quercetin, ellagic acid |
| HMOX1 | Heme oxygenase 1 | [P09601](https://www.uniprot.org/uniprot/P09601) | 50 | quercetin |
| CYP3A4 | Cytochrome P450 3A4 | [P08684](https://www.uniprot.org/uniprot/P08684) | 19 | quercetin |
| CAV1 | Caveolin-1 | [Q03135](https://www.uniprot.org/uniprot/Q03135) | 35 | quercetin |
| MYC | Myc proto-oncogene protein | [P01106](https://www.uniprot.org/uniprot/P01106) | 61 | quercetin |
| F3 | Tissue factor | [P13726](https://www.uniprot.org/uniprot/P13726) | 24 | quercetin |
| CYP1A1 | Cytochrome P450 1A1 | [P04798](https://www.uniprot.org/uniprot/P04798) | 20 | quercetin |
| ICAM1 | Intercellular adhesion molecule 1 | [P05362](https://www.uniprot.org/uniprot/P05362) | 48 | quercetin |
| IL1B | Interleukin-1 beta | [P01584](https://www.uniprot.org/uniprot/P01584) | 70 | quercetin |
| CCL2 | C-C motif chemokine 2 | [P13500](https://www.uniprot.org/uniprot/P13500) | 55 | quercetin |
| SELE | E-selectin | [P16581](https://www.uniprot.org/uniprot/P16581) | 32 | quercetin |
| VCAM1 | Vascular cell adhesion protein 1 | [P19320](https://www.uniprot.org/uniprot/P19320) | 44 | quercetin |
| BIRC5 | Baculoviral IAP repeat-containing protein 5 | [O15392](https://www.uniprot.org/uniprot/O15392) | 19 | quercetin |
| DUOX2 | Dual oxidase 2 | [Q9NRD8](https://www.uniprot.org/uniprot/Q9NRD8) | 11 | quercetin |
| NOS3 | Nitric oxide synthase, endothelial | [P29474](https://www.uniprot.org/uniprot/P29474) | 40 | quercetin |
| IL2 | Interleukin-2 | [P60568](https://www.uniprot.org/uniprot/P60568) | 44 | quercetin |
| NR1I2 | Nuclear receptor subfamily 1 group I member 2 | [O75469](https://www.uniprot.org/uniprot/O75469) | 15 | quercetin |
| CYP1B1 | Cytochrome P450 1B1 | [Q16678](https://www.uniprot.org/uniprot/Q16678) | 14 | quercetin |
| THBD | Thrombomodulin | [P07204](https://www.uniprot.org/uniprot/P07204) | 15 | quercetin |
| SERPINE1 | Plasminogen activator inhibitor 1 | [P05121](https://www.uniprot.org/uniprot/P05121) | 43 | quercetin |
| IFNG | Interferon gamma | [P01579](https://www.uniprot.org/uniprot/P01579) | 47 | quercetin |
| ALOX5 | Polyunsaturated fatty acid 5-lipoxygenase | [P09917](https://www.uniprot.org/uniprot/P09917) | 16 | quercetin, ellagic acid |
| IL1A | Interleukin-1 alpha | [P01583](https://www.uniprot.org/uniprot/P01583) | 36 | quercetin |
| MPO | Myeloperoxidase | [P05164](https://www.uniprot.org/uniprot/P05164) | 36 | quercetin |
| NCF1 | Neutrophil cytosol factor 1 | P14598 | 22 | quercetin |
| ABCG2 | Broad substrate specificity ATP-binding cassette transporter ABCG2 | [Q9UNQ0](https://www.uniprot.org/uniprot/Q9UNQ0) | 18 | quercetin |
| NFE2L2 | Nuclear factor erythroid 2-related factor 2 | [Q16236](https://www.uniprot.org/uniprot/Q16236) | 37 | quercetin |
| NQO1 | NAD(P)H dehydrogenase [quinone] 1 | [P15559](https://www.uniprot.org/uniprot/P15559) | 25 | quercetin |
| PARP1 | Poly [ADP-ribose] polymerase 1 | [P09874](https://www.uniprot.org/uniprot/P09874) | 32 | quercetin |
| AHR | Aryl hydrocarbon receptor | [P35869](https://www.uniprot.org/uniprot/P35869) | 29 | quercetin |
| CXCL2 | C-X-C motif chemokine 2 | [P19875](https://www.uniprot.org/uniprot/P19875) | 25 | quercetin |
| CHEK2 | Serine/threonine-protein kinase Chk2 | [O96017](https://www.uniprot.org/uniprot/O96017) | 19 | quercetin |
| INSR | Insulin receptor | [P06213](https://www.uniprot.org/uniprot/P06213) | 10 | quercetin, ellagic acid |
| CLDN4 | Claudin-4 | [O14493](https://www.uniprot.org/uniprot/O14493) | 2 | quercetin |
| PPARA | Peroxisome proliferator-activated receptor alpha | [Q07869](https://www.uniprot.org/uniprot/Q07869) | 37 | quercetin, poriferast-5-en-3beta-o, beta-sitosterol |
| CXCL10 | C-X-C motif chemokine 10 | [P02778](https://www.uniprot.org/uniprot/P02778) | 32 | quercetin |
| CHUK | Inhibitor of nuclear factor kappa-B kinase subunit alpha | [O15111](https://www.uniprot.org/uniprot/O15111) | 27 | quercetin |
| SPP1 | Osteopontin | [P10451](https://www.uniprot.org/uniprot/P10451) | 36 | quercetin |
| RUNX2 | Runt-related transcription factor 2 | [Q13950](https://www.uniprot.org/uniprot/Q13950) | 27 | quercetin |
| CTSD | Cathepsin D | [P07339](https://www.uniprot.org/uniprot/P07339) | 18 | quercetin |
| IGFBP3 | Insulin-like growth factor-binding protein 3 | [P17936](https://www.uniprot.org/uniprot/P17936) | 29 | quercetin |
| CD40LG | CD40 ligand | [P29965](https://www.uniprot.org/uniprot/P29965) | 27 | quercetin |
| IRF1 | Interferon regulatory factor 1 | [P10914](https://www.uniprot.org/uniprot/P10914) | 26 | quercetin |
| ERBB3 | Receptor tyrosine-protein kinase erbB-3 | [P21860](https://www.uniprot.org/uniprot/P21860) | 15 | quercetin |
| CDK2 | Cyclin-dependent kinase 2 | [P24941](https://www.uniprot.org/uniprot/P24941) | 31 | quercetin, ellagic acid |

TABLE S5: The information of PB-composition-target-pathway network.

| Medication | Composition | Target | Pathway |
| --- | --- | --- | --- |
| Polygonum Bistorta | quercetin | AKT1 | TNF signaling pathway |
| Polygonum Bistorta | beta-sitosterol | CASP3 | TNF signaling pathway |
| Polygonum Bistorta | quercetin | CASP3 | TNF signaling pathway |
| Polygonum Bistorta | beta-sitosterol | CASP8 | TNF signaling pathway |
| Polygonum Bistorta | quercetin | CASP8 | TNF signaling pathway |
| Polygonum Bistorta | quercetin | CHUK | TNF signaling pathway |
| Polygonum Bistorta | quercetin | FOS | TNF signaling pathway |
| Polygonum Bistorta | quercetin | CXCL2 | TNF signaling pathway |
| Polygonum Bistorta | quercetin | ICAM1 | TNF signaling pathway |
| Polygonum Bistorta | quercetin | IL1B | TNF signaling pathway |
| Polygonum Bistorta | quercetin | CXCL10 | TNF signaling pathway |
| Polygonum Bistorta | quercetin | IRF1 | TNF signaling pathway |
| Polygonum Bistorta | quercetin | JUN | TNF signaling pathway |
| Polygonum Bistorta | beta-sitosterol | JUN | TNF signaling pathway |
| Polygonum Bistorta | quercetin | MMP3 | TNF signaling pathway |
| Polygonum Bistorta | ellagic acid | MMP9 | TNF signaling pathway |
| Polygonum Bistorta | quercetin | MMP9 | TNF signaling pathway |
| Polygonum Bistorta | ellagic acid | NFKBIA | TNF signaling pathway |
| Polygonum Bistorta | quercetin | MAPK1 | TNF signaling pathway |
| Polygonum Bistorta | quercetin | PTGS2 | TNF signaling pathway |
| Polygonum Bistorta | ZINC04073977 | PTGS2 | TNF signaling pathway |
| Polygonum Bistorta | ellagic acid | RELA | TNF signaling pathway |
| Polygonum Bistorta | quercetin | CCL2 | TNF signaling pathway |
| Polygonum Bistorta | quercetin | SELE | TNF signaling pathway |
| Polygonum Bistorta | quercetin | VCAM1 | TNF signaling pathway |
| Polygonum Bistorta | quercetin | IRF1 | TNF signaling pathway |
| Polygonum Bistorta | beta-sitosterol | CASP3 | IL-17 signaling pathway |
| Polygonum Bistorta | quercetin | CASP3 | IL-17 signaling pathway |
| Polygonum Bistorta | quercetin | CASP8 | IL-17 signaling pathway |
| Polygonum Bistorta | beta-sitosterol | CASP8 | IL-17 signaling pathway |
| Polygonum Bistorta | quercetin | CHUK | IL-17 signaling pathway |
| Polygonum Bistorta | quercetin | FOS | IL-17 signaling pathway |
| Polygonum Bistorta | quercetin | CXCL2 | IL-17 signaling pathway |
| Polygonum Bistorta | ellagic acid | HSP90AA1 | IL-17 signaling pathway |
| Polygonum Bistorta | beta-sitosterol | HSP90AA1 | IL-17 signaling pathway |
| Polygonum Bistorta | quercetin | HSP90AA1 | IL-17 signaling pathway |
| Polygonum Bistorta | quercetin | IFNG | IL-17 signaling pathway |
| Polygonum Bistorta | quercetin | IL1B | IL-17 signaling pathway |
| Polygonum Bistorta | ellagic acid | CXCL8 | IL-17 signaling pathway |
| Polygonum Bistorta | quercetin | CXCL8 | IL-17 signaling pathway |
| Polygonum Bistorta | quercetin | CXCL10 | IL-17 signaling pathway |
| Polygonum Bistorta | quercetin | JUN | IL-17 signaling pathway |
| Polygonum Bistorta | beta-sitosterol | JUN | IL-17 signaling pathway |
| Polygonum Bistorta | quercetin | MMP1 | IL-17 signaling pathway |
| Polygonum Bistorta | quercetin | MMP3 | IL-17 signaling pathway |
| Polygonum Bistorta | ellagic acid | MMP9 | IL-17 signaling pathway |
| Polygonum Bistorta | quercetin | MMP9 | IL-17 signaling pathway |
| Polygonum Bistorta | ellagic acid | NFKBIA | IL-17 signaling pathway |
| Polygonum Bistorta | quercetin | MAPK1 | IL-17 signaling pathway |
| Polygonum Bistorta | quercetin | PTGS2 | IL-17 signaling pathway |
| Polygonum Bistorta | ZINC04073977 | PTGS2 | IL-17 signaling pathway |
| Polygonum Bistorta | ellagic acid | RELA | IL-17 signaling pathway |
| Polygonum Bistorta | quercetin | CCL2 | IL-17 signaling pathway |
| Polygonum Bistorta | quercetin | AKT1 | Colorectal cancer |
| Polygonum Bistorta | quercetin | BIRC5 | Colorectal cancer |
| Polygonum Bistorta | quercetin | BAX | Colorectal cancer |
| Polygonum Bistorta | beta-sitosterol | BAX | Colorectal cancer |
| Polygonum Bistorta | quercetin | CCND1 | Colorectal cancer |
| Polygonum Bistorta | quercetin | BCL2 | Colorectal cancer |
| Polygonum Bistorta | beta-sitosterol | BCL2 | Colorectal cancer |
| Polygonum Bistorta | beta-sitosterol | CASP3 | Colorectal cancer |
| Polygonum Bistorta | quercetin | CASP3 | Colorectal cancer |
| Polygonum Bistorta | quercetin | CASP9 | Colorectal cancer |
| Polygonum Bistorta | ellagic acid | CDKN1A | Colorectal cancer |
| Polygonum Bistorta | quercetin | EGFR | Colorectal cancer |
| Polygonum Bistorta | quercetin | FOS | Colorectal cancer |
| Polygonum Bistorta | quercetin | JUN | Colorectal cancer |
| Polygonum Bistorta | beta-sitosterol | JUN | Colorectal cancer |
| Polygonum Bistorta | quercetin | MYC | Colorectal cancer |
| Polygonum Bistorta | quercetin | MAPK1 | Colorectal cancer |
| Polygonum Bistorta | quercetin | RAF1 | Colorectal cancer |
| Polygonum Bistorta | quercetin | TP53 | Colorectal cancer |
| Polygonum Bistorta | quercetin | AKT1 | MAPK signaling pathway |
| Polygonum Bistorta | beta-sitosterol | CASP3 | MAPK signaling pathway |
| Polygonum Bistorta | quercetin | CASP3 | MAPK signaling pathway |
| Polygonum Bistorta | quercetin | CHUK | MAPK signaling pathway |
| Polygonum Bistorta | quercetin | EGFR | MAPK signaling pathway |
| Polygonum Bistorta | quercetin | ERBB2 | MAPK signaling pathway |
| Polygonum Bistorta | quercetin | ERBB3 | MAPK signaling pathway |
| Polygonum Bistorta | quercetin | FOS | MAPK signaling pathway |
| Polygonum Bistorta | ellagic acid | IGF2 | MAPK signaling pathway |
| Polygonum Bistorta | quercetin | IGF2 | MAPK signaling pathway |
| Polygonum Bistorta | quercetin | IL1A | MAPK signaling pathway |
| Polygonum Bistorta | quercetin | IL1B | MAPK signaling pathway |
| Polygonum Bistorta | quercetin | INSR | MAPK signaling pathway |
| Polygonum Bistorta | quercetin | JUN | MAPK signaling pathway |
| Polygonum Bistorta | beta-sitosterol | JUN | MAPK signaling pathway |
| Polygonum Bistorta | quercetin | MYC | MAPK signaling pathway |
| Polygonum Bistorta | quercetin | MAPK1 | MAPK signaling pathway |
| Polygonum Bistorta | quercetin | RAF1 | MAPK signaling pathway |
| Polygonum Bistorta | quercetin | RELA | MAPK signaling pathway |
| Polygonum Bistorta | quercetin | TP53 | MAPK signaling pathway |
| Polygonum Bistorta | quercetin | AKT1 | VEGF signaling pathway |
| Polygonum Bistorta | quercetin | CASP9 | VEGF signaling pathway |
| Polygonum Bistorta | quercetin | NOS3 | VEGF signaling pathway |
| Polygonum Bistorta | quercetin | MAPK1 | VEGF signaling pathway |
| Polygonum Bistorta | quercetin | PTGS2 | VEGF signaling pathway |
| Polygonum Bistorta | quercetin | RAF1 | VEGF signaling pathway |
| Polygonum Bistorta | quercetin | AKT1 | Toll-like receptor signaling pathway |
| Polygonum Bistorta | quercetin | CASP8 | Toll-like receptor signaling pathway |
| Polygonum Bistorta | beta-sitosterol | CASP8 | Toll-like receptor signaling pathway |
| Polygonum Bistorta | quercetin | CHUK | Toll-like receptor signaling pathway |
| Polygonum Bistorta | quercetin | FOS | Toll-like receptor signaling pathway |
| Polygonum Bistorta | quercetin | IL1B | Toll-like receptor signaling pathway |
| Polygonum Bistorta | ellagic acid | CXCL8 | Toll-like receptor signaling pathway |
| Polygonum Bistorta | quercetin | CXCL8 | Toll-like receptor signaling pathway |
| Polygonum Bistorta | quercetin | CXCL10 | Toll-like receptor signaling pathway |
| Polygonum Bistorta | quercetin | JUN | Toll-like receptor signaling pathway |
| Polygonum Bistorta | beta-sitosterol | JUN | Toll-like receptor signaling pathway |
| Polygonum Bistorta | ellagic acid | NFKBIA | Toll-like receptor signaling pathway |
| Polygonum Bistorta | quercetin | MAPK1 | Toll-like receptor signaling pathway |
| Polygonum Bistorta | quercetin | RELA | Toll-like receptor signaling pathway |
| Polygonum Bistorta | ellagic acid | RELA | Toll-like receptor signaling pathway |
| Polygonum Bistorta | quercetin | SPP1 | Toll-like receptor signaling pathway |
| Polygonum Bistorta | quercetin | STAT1 | Toll-like receptor signaling pathway |
| Polygonum Bistorta | quercetin | AKT1 | Jak-STAT signaling pathway |
| Polygonum Bistorta | quercetin | CCND1 | Jak-STAT signaling pathway |
| Polygonum Bistorta | beta-sitosterol | BCL2 | Jak-STAT signaling pathway |
| Polygonum Bistorta | quercetin | BCL2 | Jak-STAT signaling pathway |
| Polygonum Bistorta | quercetin | BCL2L1 | Jak-STAT signaling pathway |
| Polygonum Bistorta | ellagic acid | CDKN1A | Jak-STAT signaling pathway |
| Polygonum Bistorta | quercetin | CDKN1A | Jak-STAT signaling pathway |
| Polygonum Bistorta | quercetin | EGFR | Jak-STAT signaling pathway |
| Polygonum Bistorta | quercetin | IFNG | Jak-STAT signaling pathway |
| Polygonum Bistorta | quercetin | IL2 | Jak-STAT signaling pathway |
| Polygonum Bistorta | quercetin | IL6ST | Jak-STAT signaling pathway |
| Polygonum Bistorta | quercetin | IL10RB | Jak-STAT signaling pathway |
| Polygonum Bistorta | quercetin | MYC | Jak-STAT signaling pathway |
| Polygonum Bistorta | quercetin | RAF1 | Jak-STAT signaling pathway |
| Polygonum Bistorta | quercetin | STAT1 | Jak-STAT signaling pathway |
| Polygonum Bistorta | quercetin | PARP1 | NF-kappa B signaling pathway |
| Polygonum Bistorta | beta-sitosterol | BCL2 | NF-kappa B signaling pathway |
| Polygonum Bistorta | quercetin | BCL2 | NF-kappa B signaling pathway |
| Polygonum Bistorta | quercetin | BCL2L1 | NF-kappa B signaling pathway |
| Polygonum Bistorta | quercetin | CD40LG | NF-kappa B signaling pathway |
| Polygonum Bistorta | quercetin | CHUK | NF-kappa B signaling pathway |
| Polygonum Bistorta | quercetin | CXCL2 | NF-kappa B signaling pathway |
| Polygonum Bistorta | quercetin | ICAM1 | NF-kappa B signaling pathway |
| Polygonum Bistorta | quercetin | IL1B | NF-kappa B signaling pathway |
| Polygonum Bistorta | ellagic acid | CXCL8 | NF-kappa B signaling pathway |
| Polygonum Bistorta | quercetin | CXCL8 | NF-kappa B signaling pathway |
| Polygonum Bistorta | ellagic acid | NFKBIA | NF-kappa B signaling pathway |
| Polygonum Bistorta | quercetin | PLAU | NF-kappa B signaling pathway |
| Polygonum Bistorta | ZINC04073977 | PTGS2 | NF-kappa B signaling pathway |
| Polygonum Bistorta | beta-sitosterol | PTGS2 | NF-kappa B signaling pathway |
| Polygonum Bistorta | (+)-catechin | PTGS2 | NF-kappa B signaling pathway |
| Polygonum Bistorta | quercetin | PTGS2 | NF-kappa B signaling pathway |
| Polygonum Bistorta | quercetin | RELA | NF-kappa B signaling pathway |
| Polygonum Bistorta | ellagic acid | RELA | NF-kappa B signaling pathway |
| Polygonum Bistorta | quercetin | VCAM1 | NF-kappa B signaling pathway |
| Polygonum Bistorta | quercetin | CCND1 | Tight junction |
| Polygonum Bistorta | quercetin | CLDN4 | Tight junction |
| Polygonum Bistorta | quercetin | JUN | Tight junction |
| Polygonum Bistorta | beta-sitosterol | JUN | Tight junction |
| Polygonum Bistorta | quercetin | ERBB2 | Tight junction |
